# Supplementary material for: “Warm cover”: precursory strong signals for haze pollution hidden in the middle troposphere
Source: Copernicus journal article supplement (doi:10.5194/acp-21-14131-2021), 2021-09-23
Supplement: Supplementary file 1 [file acp-21-14131-2021-supplement.pdf]

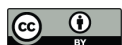

*Supplement of*

## **“Warm cover”: precursory strong signals for haze pollution hidden in the middle troposphere**

**Xiangde Xu et al.**

*Correspondence to:* Wenyue Cai ([caiwy@cma.gov.cn](mailto:caiwy@cma.gov.cn)) and Tianliang Zhao ([tlzhao@nuist.edu.cn](mailto:tlzhao@nuist.edu.cn))

The copyright of individual parts of the supplement might differ from the article licence.

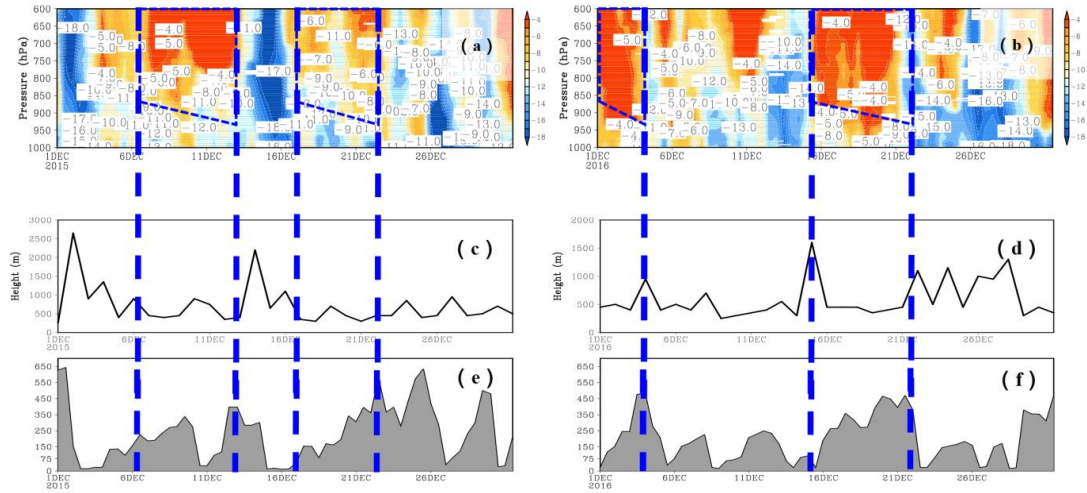

Figure S1. (a, b) Time-vertical cross-sections of air temperature anomalies over Beijing. (c, d) The variation of the height of the atmospheric boundary layer (ABL, units: m) and (e, f) the surface PM<sub>2.5</sub> concentrations over Beijing. Panels (a, c, e) show the event during December 2015, while panels (b, d, f) show the event during December 2016.
